# Supplementary material for: Morphology controlled growth of arrays of GaN nanopillars and randomly distributed GaN nanowires on sapphire using (N3)2Ga[(CH2)3NMe2] as a single molecule precursorElectronic supplementary information (ESI) available: characterisation data. See http://www.rsc.org/suppdata/cc/b2/b201858f/
Source: Royal Society of Chemistry journal article supplement (doi:10.1039/b201858f), 2002-04-09
Supplement: b201858f.pdf [file b201858f.pdf]

# Supplementary information

## 1.) $\alpha$ -GaN nanopillars

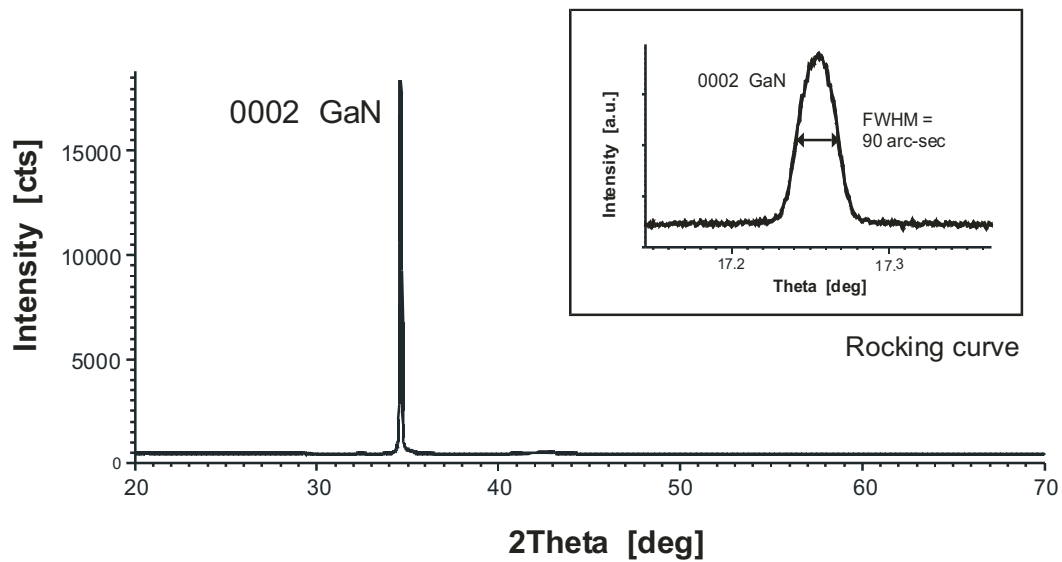

Fig. 1) Diffractogram and rocking curve (inset) of the  $\alpha$ -GaN nanopillars.

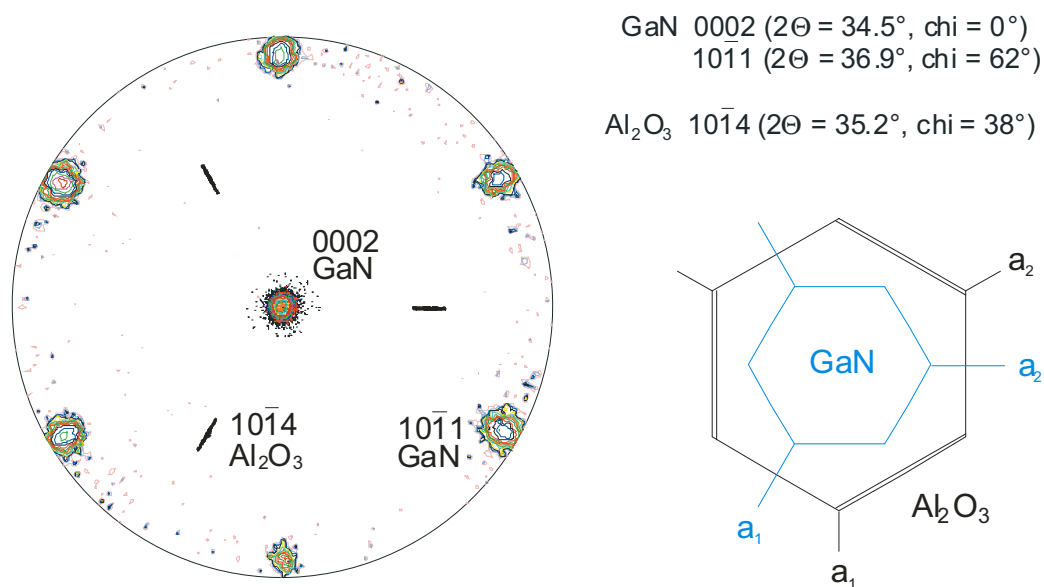

Fig. 2) Pole figure measurement of the (0002) and (10 $\bar{1}$ 1) reflections of the  $\alpha$ -GaN nanopillars and the (10 $\bar{1}$ 4) reflection of the (0001)-Al<sub>2</sub>O<sub>3</sub> substrate.

2.)  $\alpha$ -GaN nanowires using  $(\text{N}_3)_2\text{Ga}[(\text{CH}_2)_3\text{NMe}_2]$  and  $\text{H}_2$

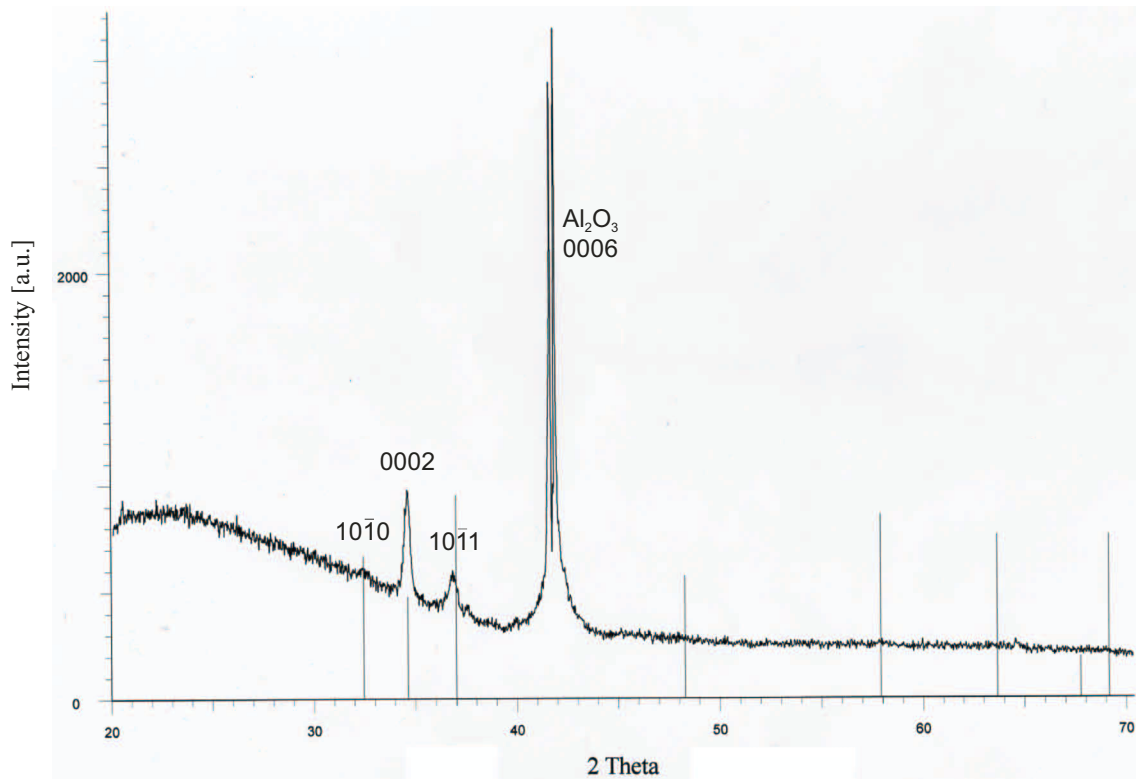

Fig. 3) Diffractogram of the  $\alpha$ -GaN nanowires.

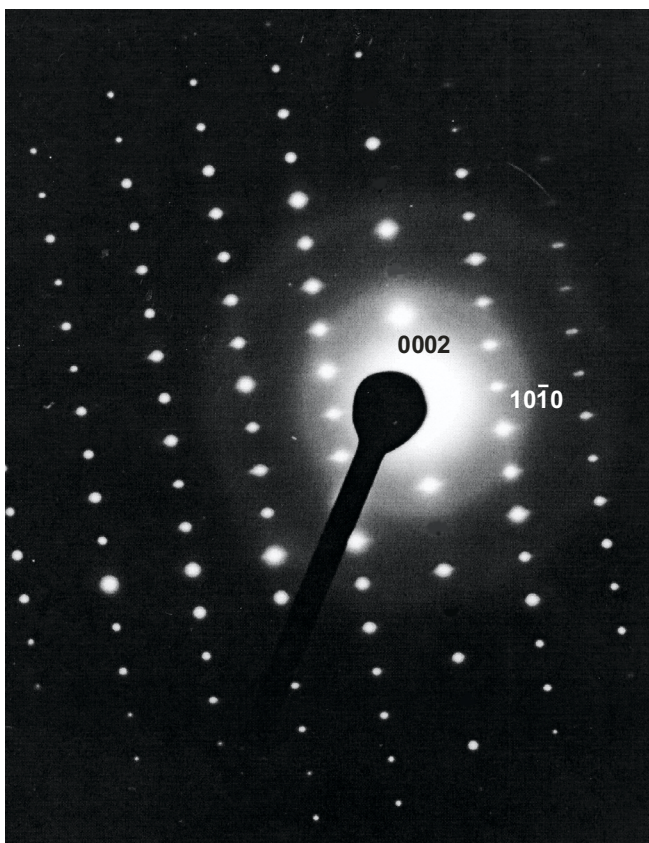

Fig. 4) SAED pattern of the  $\alpha$ -GaN nanowires

### 3.) $\alpha$ -GaN nanowires using Ga and $\text{NH}_3$

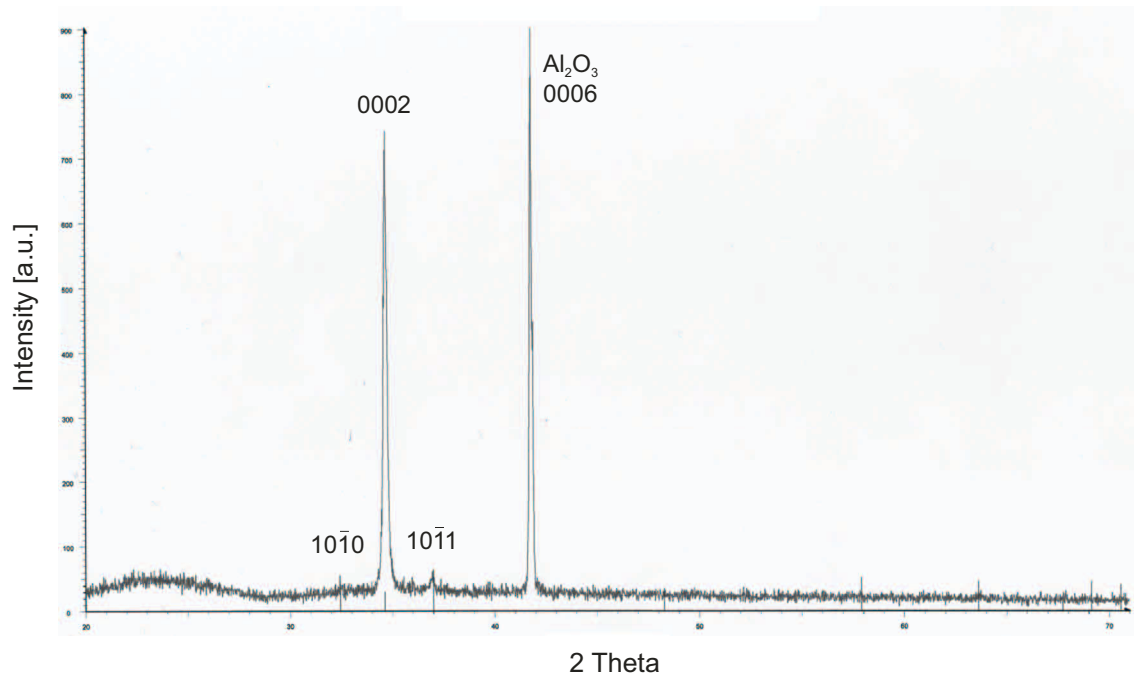

Fig. 5) Diffractogram of the  $\alpha$ -GaN nanowires grown by direct reaction of Ga and  $\text{NH}_3$ .

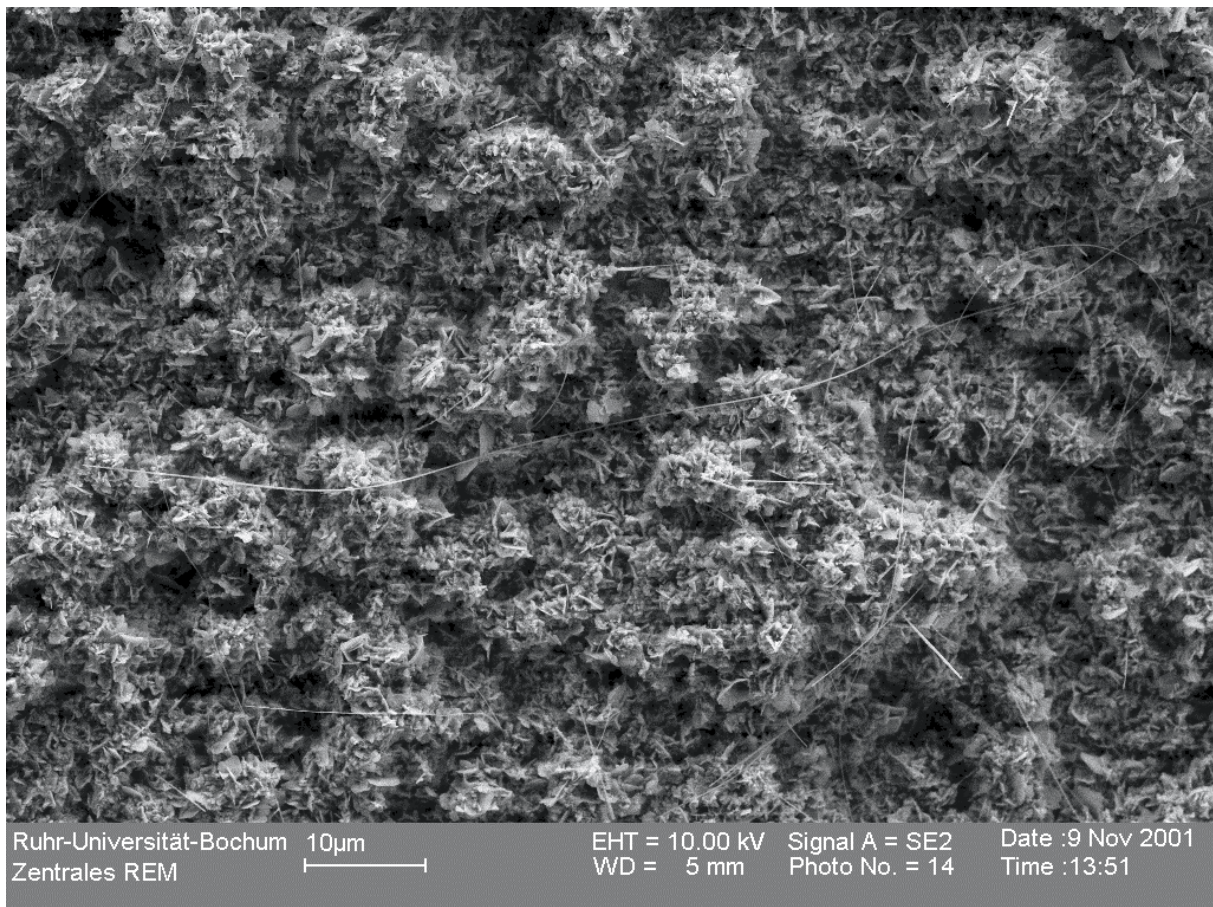

Fig. 6) SEM of the  $\alpha$ -GaN nanowires.



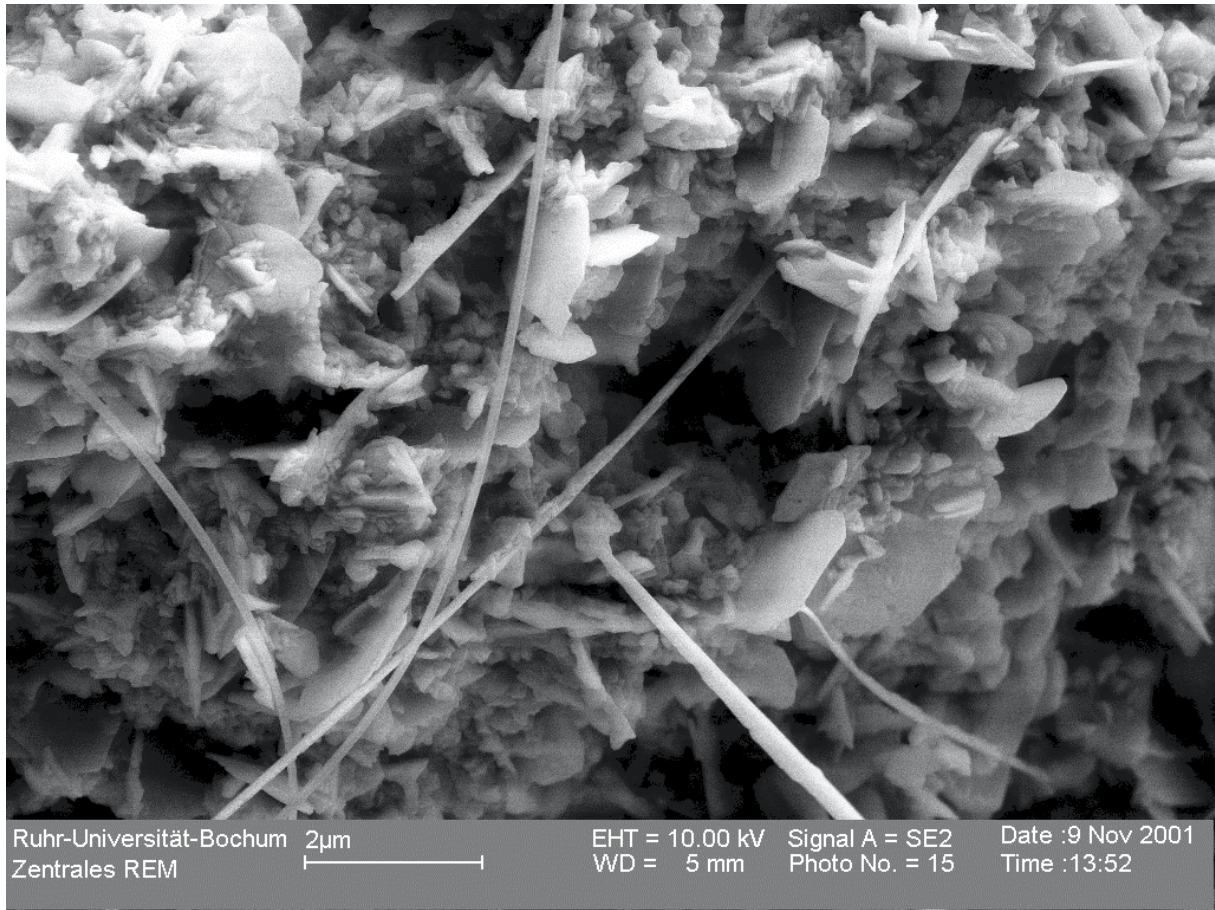

Fig. 7) SEM of the  $\alpha$ -GaN nanowires.
